# Supplementary material
Source: PubMed Central journal article supplement (PMC3197697)

# A Sucrose-derived Scaffold for Multimerization of Bioactive Peptides

Venkataramanarao Rao,<sup>a</sup> Ramesh Alleti,<sup>a</sup> Liping Xu,<sup>b</sup> Narges K. Tafreshi,<sup>b</sup> Robert J. Gillies,<sup>b</sup> and Eugene A. Mash<sup>a,\*</sup>

<sup>a</sup>Department of Chemistry and Biochemistry, University of Arizona, Tucson, Arizona 85721-0041

<sup>b</sup>Department of Functional and Molecular Imaging, H. Lee Moffitt Cancer Center & Research Institute, Tampa, Florida 33612

## SUPPLEMENTARY DATA

### Table of Contents:

|          |                                                                |
|----------|----------------------------------------------------------------|
| Page S2  | <b>Figure S1.</b> MALDI-TOF of <b>13</b> .                     |
| Page S3  | <b>Figure S2.</b> MALDI-TOF of <b>14a</b> .                    |
| Page S4  | <b>Figure S3.</b> MALDI-TOF of <b>14b</b> .                    |
| Page S5  | <b>Figure S4.</b> MALDI-TOF of <b>14c</b> .                    |
| Page S7  | <b>Figure S5.</b> MALDI-TOF of <b>14d</b> .                    |
| Page S9  | <b>Figure S6.</b> MALDI-TOF of <b>14e</b> .                    |
| Page S11 | <b>Figure S7.</b> MALDI-TOF of <b>15a</b> .                    |
| Page S13 | <b>Figure S8.</b> <sup>1</sup> H NMR Spectrum of <b>9</b> .    |
| Page S14 | <b>Figure S9.</b> <sup>13</sup> C NMR Spectrum of <b>9</b> .   |
| Page S15 | <b>Figure S10.</b> <sup>1</sup> H NMR Spectrum of <b>11</b> .  |
| Page S16 | <b>Figure S11.</b> <sup>13</sup> C NMR Spectrum of <b>11</b> . |



**Figure S2.** MALDI-TOF of 14a.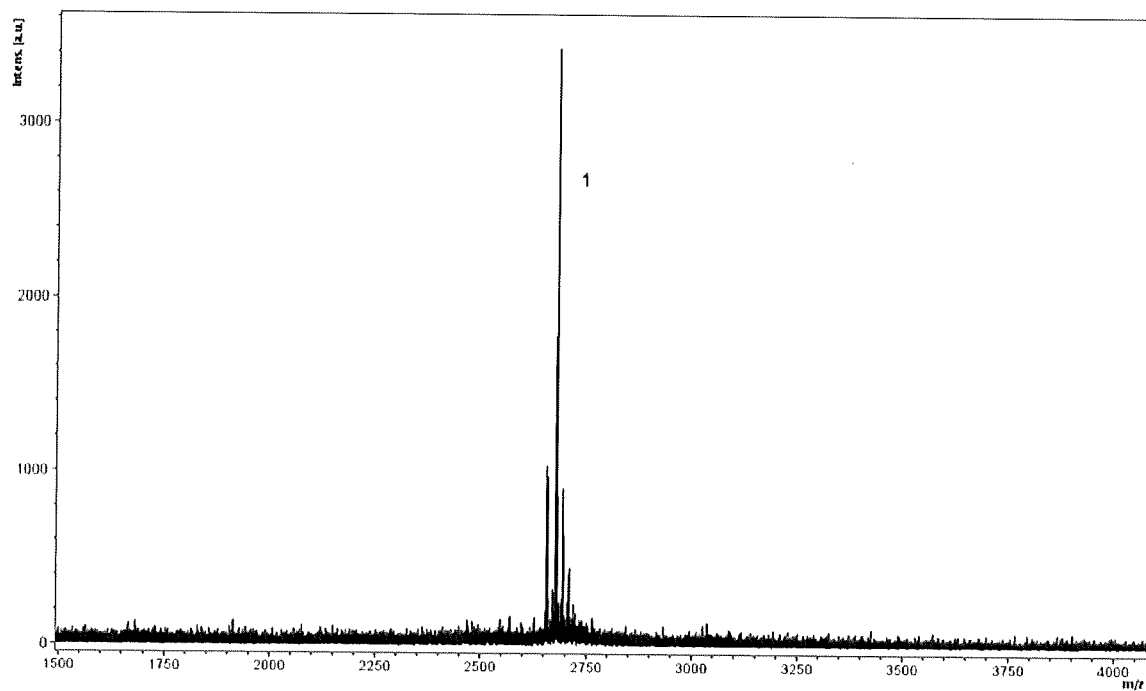

| Peak number | Number of side chains | Number of triazole rings | Number of MSH4 ligands | Number of serinamide residues* |
|-------------|-----------------------|--------------------------|------------------------|--------------------------------|
| 1           | 8                     | 8                        | 1                      | 0                              |

\*Alkynes capped with 1-azidohexane.

**Figure S3.** MALDI-TOF of **14b**.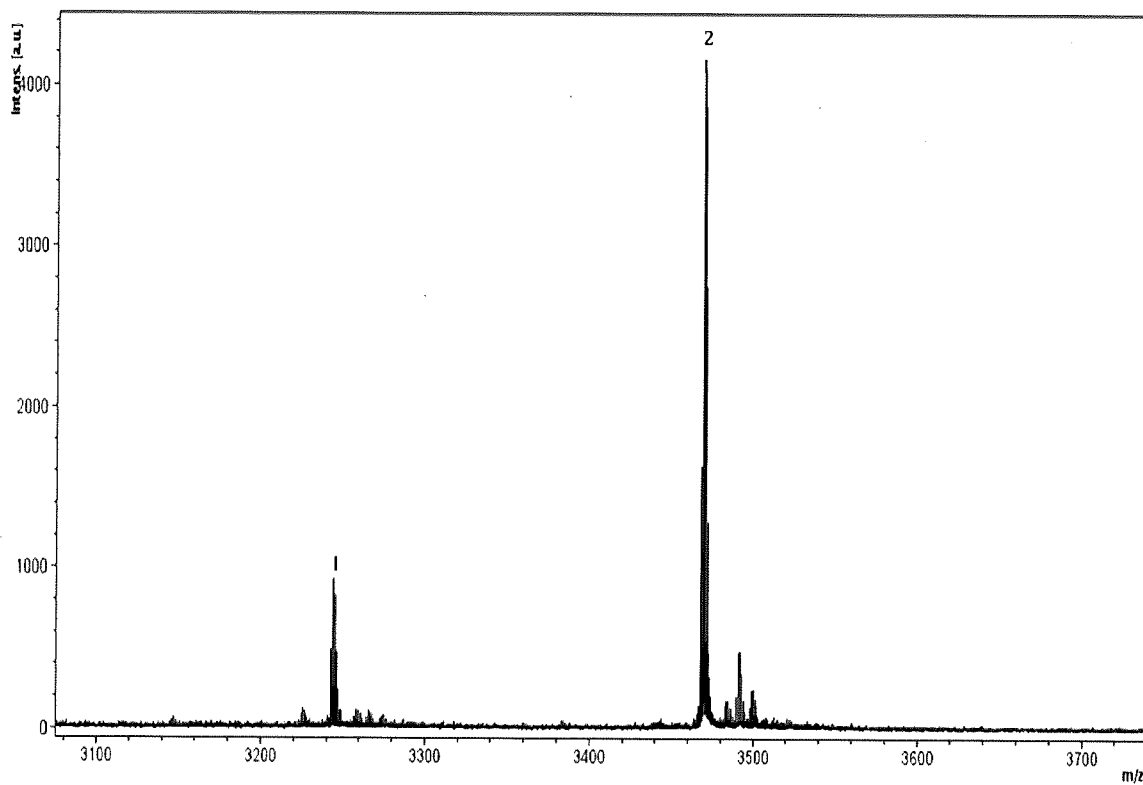

| Peak number | Number of side chains | Number of triazole rings | Number of MSH4 ligands | Number of serinamide residues |
|-------------|-----------------------|--------------------------|------------------------|-------------------------------|
| 1           | 8                     | 7                        | 1                      | 6                             |
| 2           | 8                     | 8                        | 1                      | 7                             |

Figure S4. MALDI-TOF of 14c.

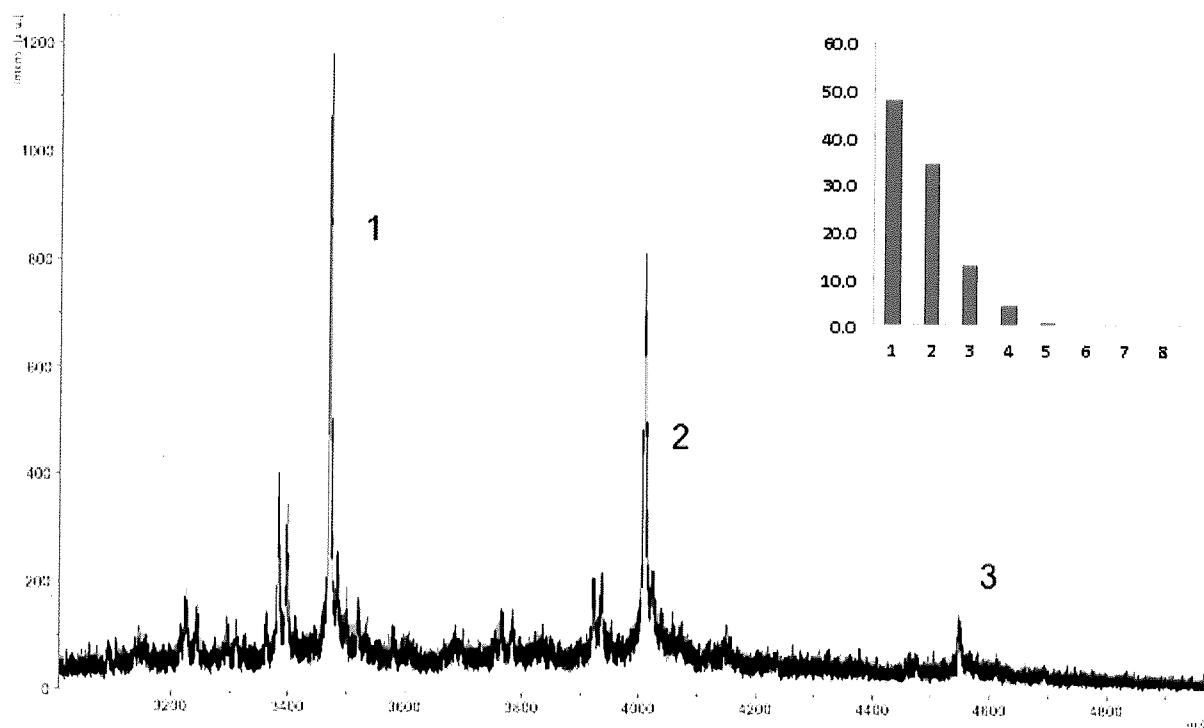

| Peak number | Number of side chains | Number of triazole rings | Number of MSH4 ligands | Number of serinamide residues |
|-------------|-----------------------|--------------------------|------------------------|-------------------------------|
| 1           | 8                     | 8                        | 1                      | 7                             |
| 2           | 8                     | 8                        | 2                      | 6                             |
| 3           | 8                     | 8                        | 3                      | 5                             |

INSERT: The statistical product distribution assuming attachment of 1.3 ligands per scaffold and equal reactivity of all alkynes throughout the reaction.

**14c [2 MSH4 + 6 Serinamide]**

Ligand concentration and distribution were calculated based on the theoretical molecular weight, UV absorbance, and areas under the mass spectrometric peaks.

Total MSH4 concentration by UV = 9.2 mM

Total MSH4 concentration by the theoretical molecular weight = 13.8 mM

Calculated number of MSH4 per scaffold by UV =  $2 \times (9.2/13.8) = 1.3$

Calculated by areas under the mass spectrometric peaks:

Weighted average molecular weight  $M_w = 3772$  (determined by area under the relevant peaks, see below)

Calculated molecular weight  $M = 4005$  (based on 2 MSH4 residues per scaffold)

MSH4 molecular weight = 782

Total MSH4 weight in the scaffold =  $2 \times 782 - (4005 - 3772) = 1331$  which is equal to 1.7 MSH4 per scaffold.

| Peak # | M+S* | M <sub>i</sub> (Mass) | N <sub>i</sub> (Area) | M <sub>i</sub> N <sub>i</sub> | M <sub>i</sub> <sup>2</sup> N <sub>i</sub> |
|--------|------|-----------------------|-----------------------|-------------------------------|--------------------------------------------|
| 1      | 1+7  | 3469                  | 6178                  | 21431482                      | 74345811058                                |
| 2      | 2+6  | 4009                  | 4690                  | 18802210                      | 75378059890                                |
| 3      | 3+5  | 4548                  | 579                   | 2633292                       | 11976212016                                |
|        |      |                       |                       |                               |                                            |
|        |      |                       | 11447                 | 42866984                      | 1.617E+11                                  |

$$M_n = \frac{\sum_i M_i N_i}{\sum_i N_i} \quad 3745$$

$$M_w = \frac{\sum_i M_i^2 N_i}{\sum_i M_i N_i} \quad 3772$$

$$\text{polydispersity} \quad M_w/M_n \quad 1.01$$

\*M= MSH4, S = Serinamide

Figure S5. MALDI-TOF of 14d.

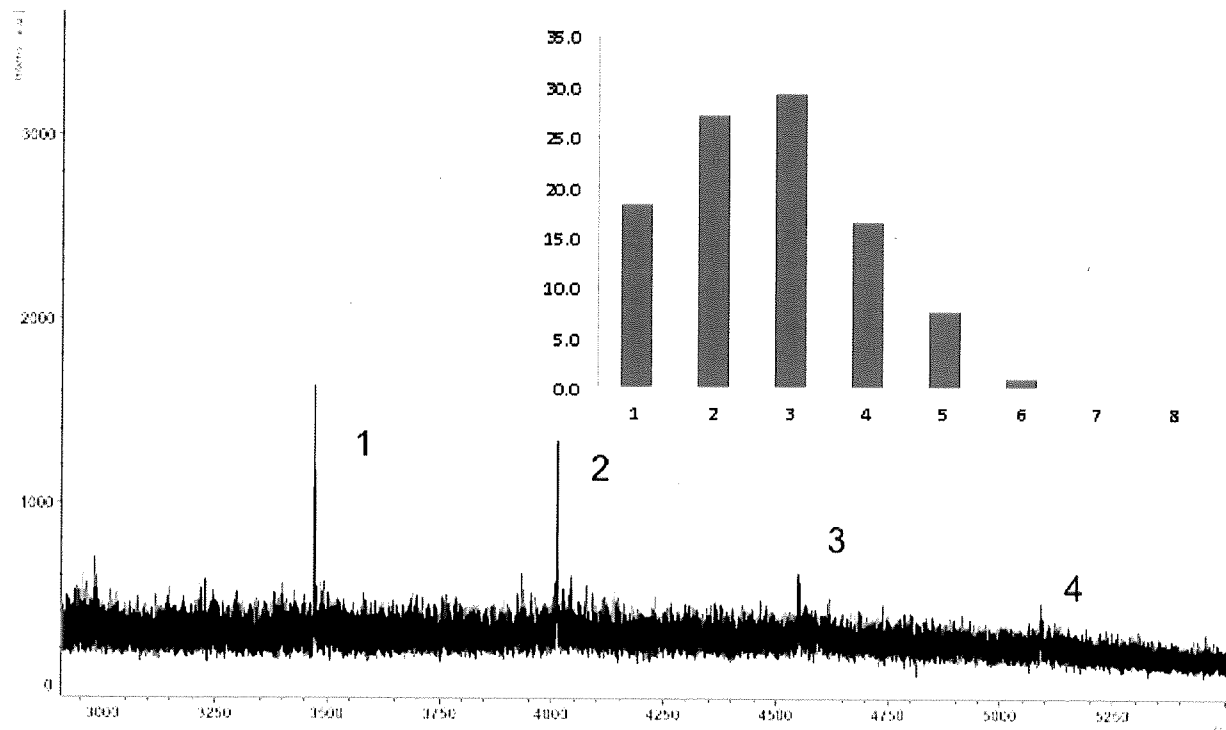

| Peak number | Number of side chains | Number of triazole rings | Number of MSH4 ligands | Number of serinamide residues |
|-------------|-----------------------|--------------------------|------------------------|-------------------------------|
| 1           | 8                     | 8                        | 1                      | 7                             |
| 2           | 8                     | 8                        | 2                      | 6                             |
| 3           | 8                     | 8                        | 3                      | 5                             |
| 4           | 8                     | 8                        | 4                      | 4                             |

INSERT: The statistical product distribution assuming attachment of 2.6 ligands per scaffold and equal reactivity of all alkynes throughout the reaction.

**14d [3 MSH4 + 5 Serinamide]**

Ligand concentration and distribution were calculated based on the theoretical molecular weight, UV absorbance, and areas under the mass spectrometric peaks.

Total MSH4 concentration by UV = 7.7 mM

Total MSH4 concentration by the theoretical molecular weight = 8.9 mM

Calculated number of MSH4 per scaffold by UV =  $3 \times (7.7/8.9) = 2.6$

Calculated by areas under the mass spectrometric peaks:

Weighted average molecular weight  $M_w = 3947$  (determined by area under the relevant peaks, see below)

Calculated molecular weight  $M = 4545$  (based on 3 MSH4 residues per scaffold)

MSH4 molecular weight = 782

Total MSH4 weight in the scaffold =  $3 \times 782 - (4545 - 3947) = 1748$  which is equal to 2.2 MSH4 per scaffold.

| Peak # | M+S* | M <sub>i</sub> (Mass) | N <sub>i</sub> (Area) | M <sub>i</sub> N <sub>i</sub> | M <sub>i</sub> <sup>2</sup> N <sub>i</sub> |
|--------|------|-----------------------|-----------------------|-------------------------------|--------------------------------------------|
| 1      | 1+7  | 3469                  | 13655                 | 47369195                      | 1.64324E+11                                |
| 2      | 2+6  | 4010                  | 11192                 | 44879920                      | 1.79968E+11                                |
| 3      | 3+5  | 4549                  | 4556                  | 20725244                      | 94279134956                                |
| 4      | 4+4  | 5087                  | 1267                  | 6445229                       | 32786879923                                |
|        |      |                       | 30670                 | 119419588                     | 4.71358E+11                                |

$$M_n = \frac{\sum_i M_i N_i}{\sum_i N_i} \quad 3894$$

$$M_w = \frac{\sum_i M_i^2 N_i}{\sum_i M_i N_i} \quad 3947$$

$$\text{polydispersity} \quad M_w/M_n \quad 1.01$$

\*M= MSH4, S = Serinamide



Figure S6. MALDI-TOF of 14e.

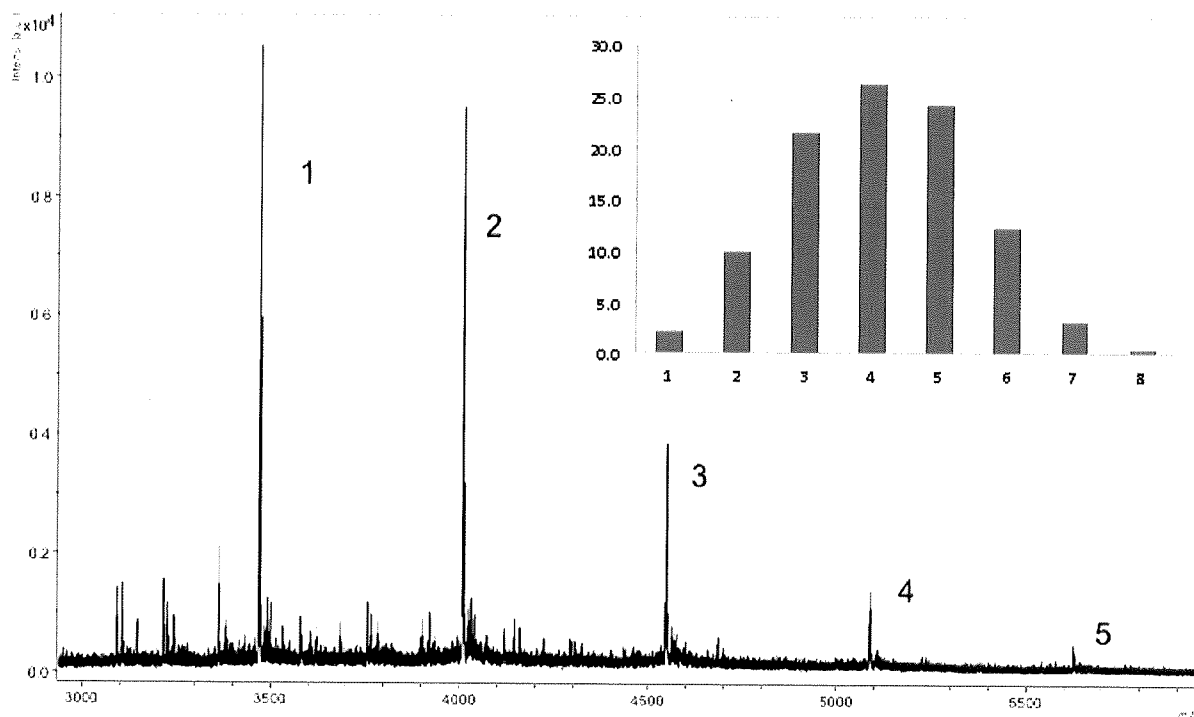

| Peak number | Number of side chains | Number of triazole rings | Number of MSH4 ligands | Number of serinamide residues |
|-------------|-----------------------|--------------------------|------------------------|-------------------------------|
| 1           | 8                     | 8                        | 1                      | 7                             |
| 2           | 8                     | 8                        | 2                      | 6                             |
| 3           | 8                     | 8                        | 3                      | 5                             |
| 4           | 8                     | 8                        | 4                      | 4                             |
| 5           | 8                     | 8                        | 5                      | 3                             |

INSERT: The statistical product distribution assuming attachment of 4.1 ligands per scaffold and equal reactivity of all alkynes throughout the reaction.

**14e [5 MSH4 + 3 Serinamide]**

Ligand concentration and distribution were calculated based on the theoretical molecular weight, UV absorbance, and areas under the mass spectrometric peaks.

Total MSH4 concentration by UV = 14.5 mM

Total MSH4 concentration by the theoretical molecular weight = 17.3 mM

Calculated number of MSH4 per scaffold by UV =  $5 \times (14.5/17.3) = 4.1$

Calculated by areas under the mass spectrometric peaks:

Weighted average molecular weight  $M_w = 4043$  (determined by area under the relevant peaks, see below)

Calculated molecular weight  $M = 5622$  (based on 5 MSH4 residues per scaffold)

MSH4 molecular weight = 782

Total MSH4 weight in the scaffold =  $5 \times 782 - (5622 - 4043) = 2331$  which is equal to 3.0 MSH4 per scaffold.

| Peak # | M+S* | M <sub>i</sub> (Mass) | N <sub>i</sub> (Area) | M <sub>i</sub> N <sub>i</sub> | M <sub>i</sub> <sup>2</sup> N <sub>i</sub> |
|--------|------|-----------------------|-----------------------|-------------------------------|--------------------------------------------|
| 1      | 1+7  | 3468                  | 16244                 | 56334192                      | 1.95367E+11                                |
| 2      | 2+6  | 4007                  | 18993                 | 76104951                      | 3.04953E+11                                |
| 3      | 3+5  | 4547                  | 8374                  | 38076578                      | 1.73134E+11                                |
| 4      | 4+4  | 5087                  | 2140                  | 10886180                      | 55377997660                                |
| 5      | 5+3  | 5628                  | 521                   | 2932188                       | 16502354064                                |
|        |      |                       | 46272                 | 184334089                     | 7.45334E+11                                |

$$M_n = \frac{\sum_i M_i N_i}{\sum_i N_i} \quad 3984$$

$$M_w = \frac{\sum_i M_i^2 N_i}{\sum_i M_i N_i} \quad 4043$$

$$\text{polydispersity} \quad M_w/M_n \quad 1.01$$

\*M= MSH4, S = Serinamide

Figure S7. MALDI-TOF of 15a.

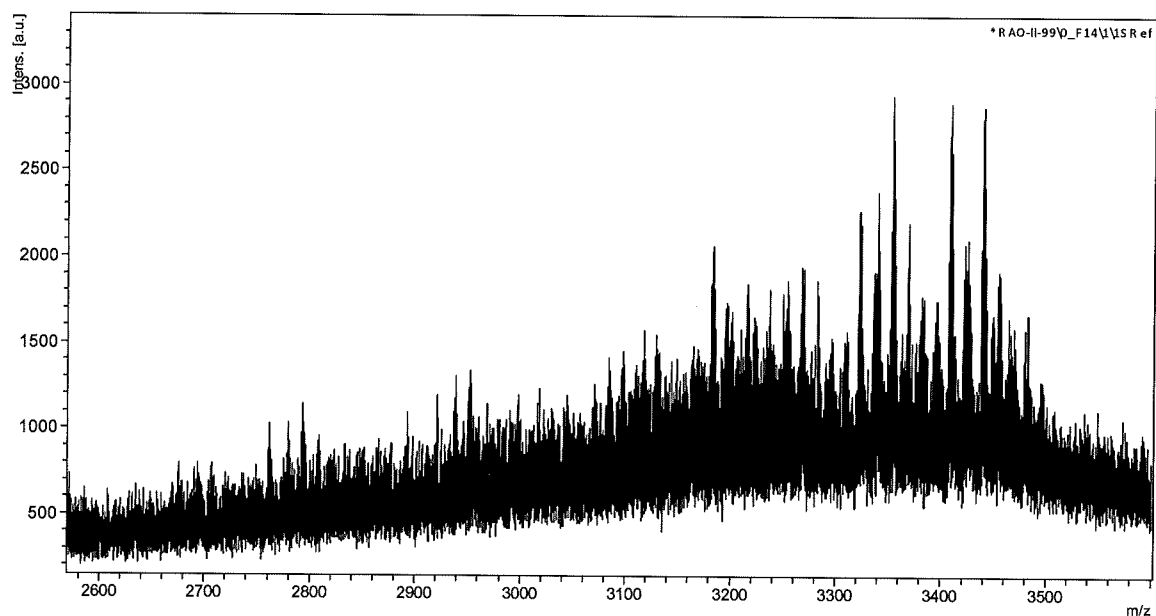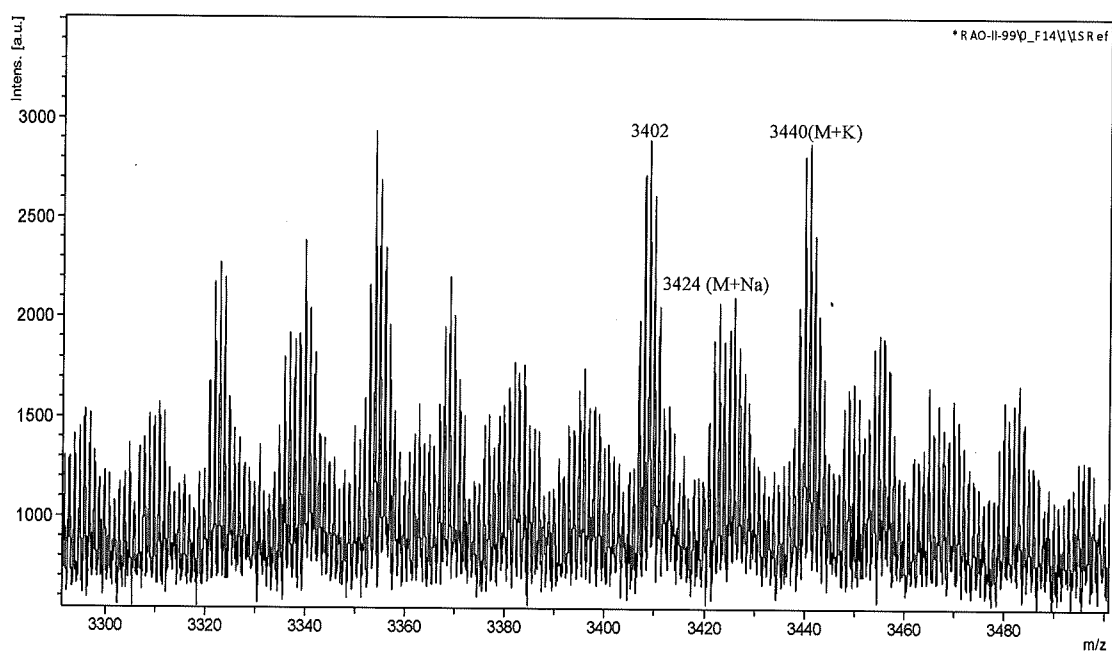

| Peak mass<br>[M+H] <sup>+</sup> | Number of side<br>chains | Number of<br>triazole rings | Number of<br>CCK4 ligands | Number of<br>serinamide<br>residues |
|---------------------------------|--------------------------|-----------------------------|---------------------------|-------------------------------------|
| 3402                            | 8                        | 8                           | 1                         | 7                                   |

**15a [1 CCK4 + 7 serinamides]**

Ligand/multimer concentration was calculated based on the UV absorbance.

Multimer concentration = CCK4 concentration = 2.1 mM by UV

**15b [2 CCK4 + 6 serinamides]**

Ligand concentration and distribution were calculated based on the theoretical molecular weight, UV absorbance.

Total CCK4 concentration by UV = 5.0 mM

Total CCK4 concentration by the theoretical molecular weight = 7.8 mM

Calculated number of CCK4 ligands per scaffold =  $2 \times (5.0/7.8) = 1.3$

**15c [3 CCK4 + 5 serinamides]**

Ligand concentration and distribution were calculated based on the theoretical molecular weight, UV absorbance.

Total CCK4 concentration by UV = 5.5 mM

Total CCK4 concentration by the theoretical molecular weight = 7.6 mM

Calculated number of CCK 4 ligands per scaffold =  $3 \times (5.5/7.6) = 2.2$

**15d [5 CCK4 + 3 serinamides]**

Ligand concentration and distribution were calculated based on the theoretical molecular weight, UV absorbance.

Total CCK4 concentration by UV = 5.1 mM

Total CCK4 concentration by the theoretical molecular weight = 7.1 mM

Calculated number of CCK 4 ligands per scaffold =  $5 \times (5.1/7.1) = 3.6$

Figure S8.  $^1\text{H-NMR}$  of Compound 9.

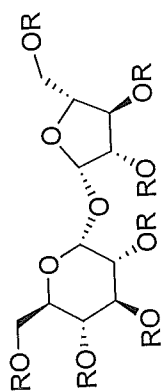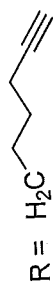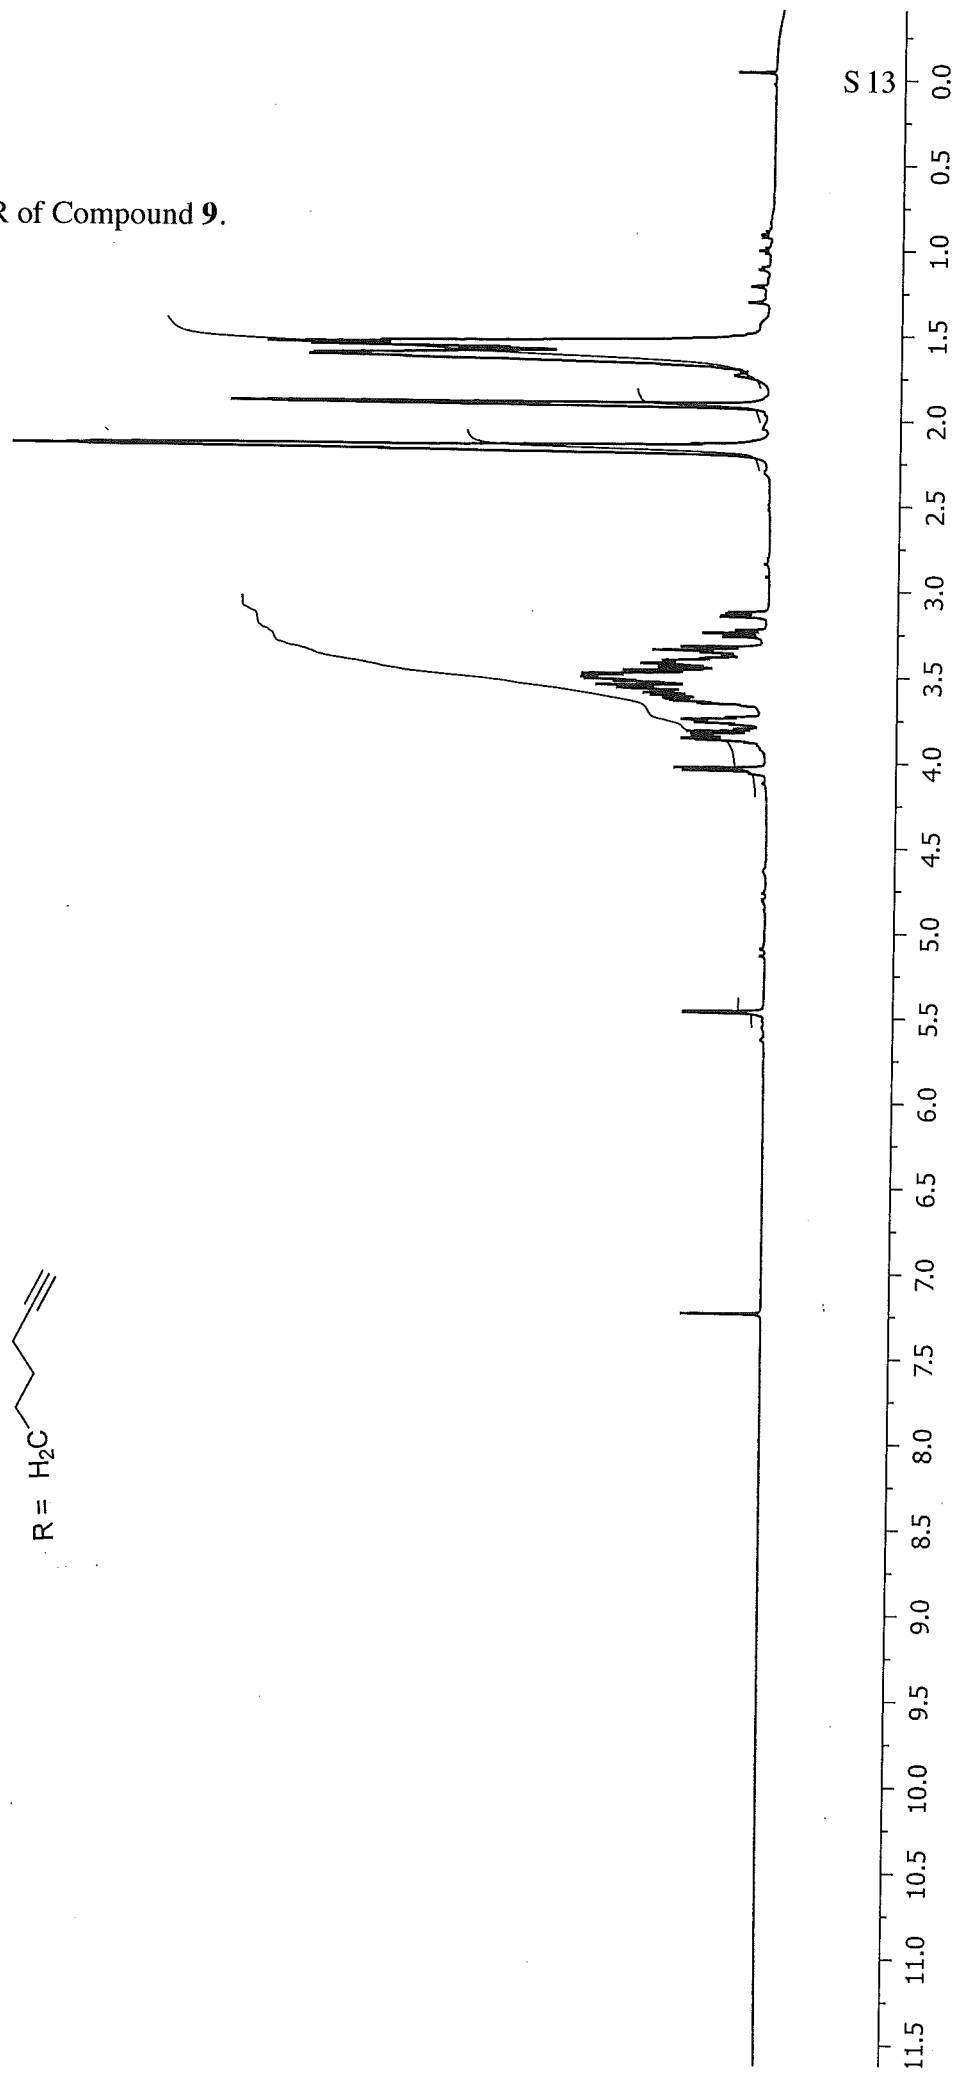

Figure S9.  $^{13}\text{C}$ -NMR of Compound 9.

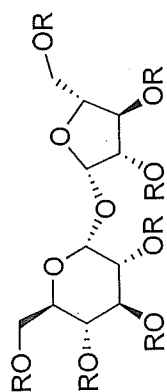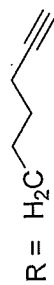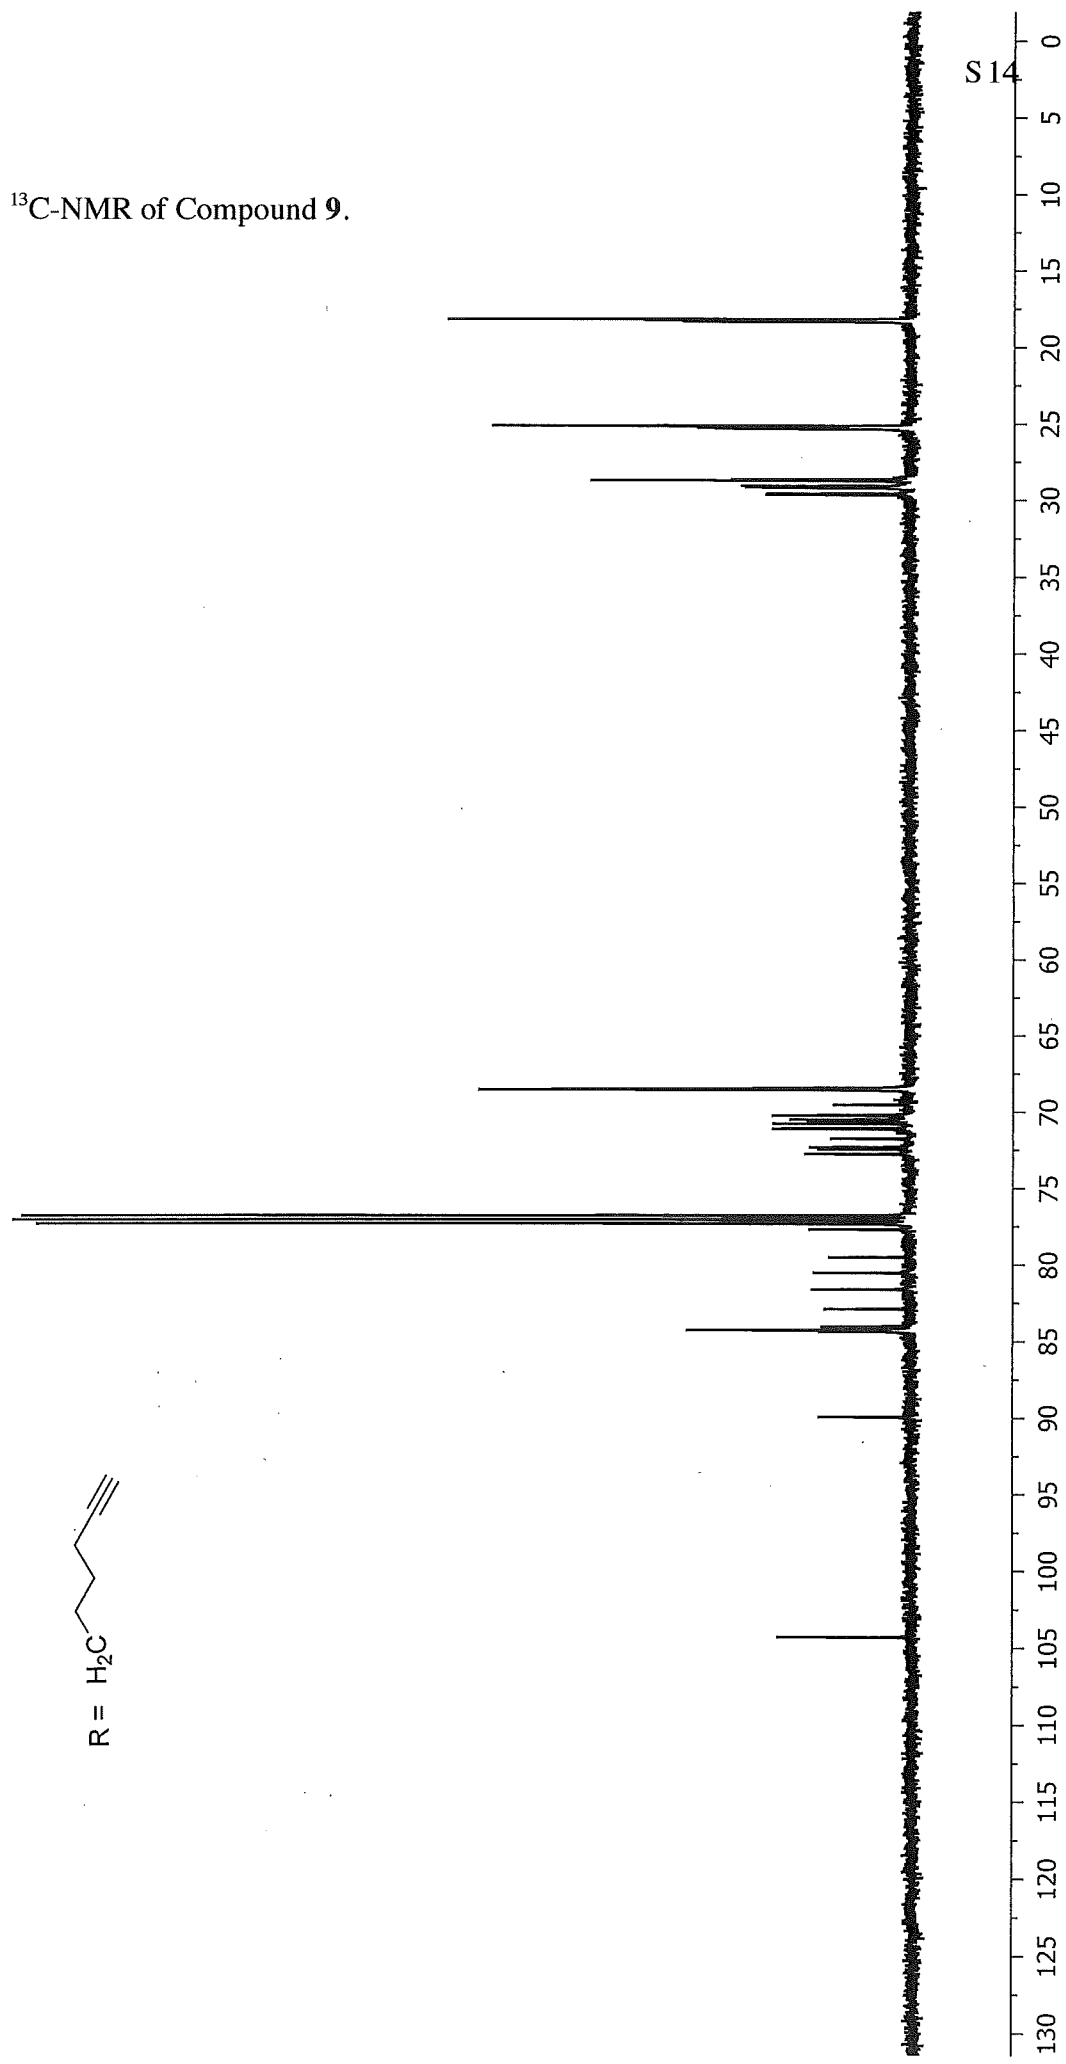

Figure S10.  $^1\text{H}$ -NMR of Compound 11.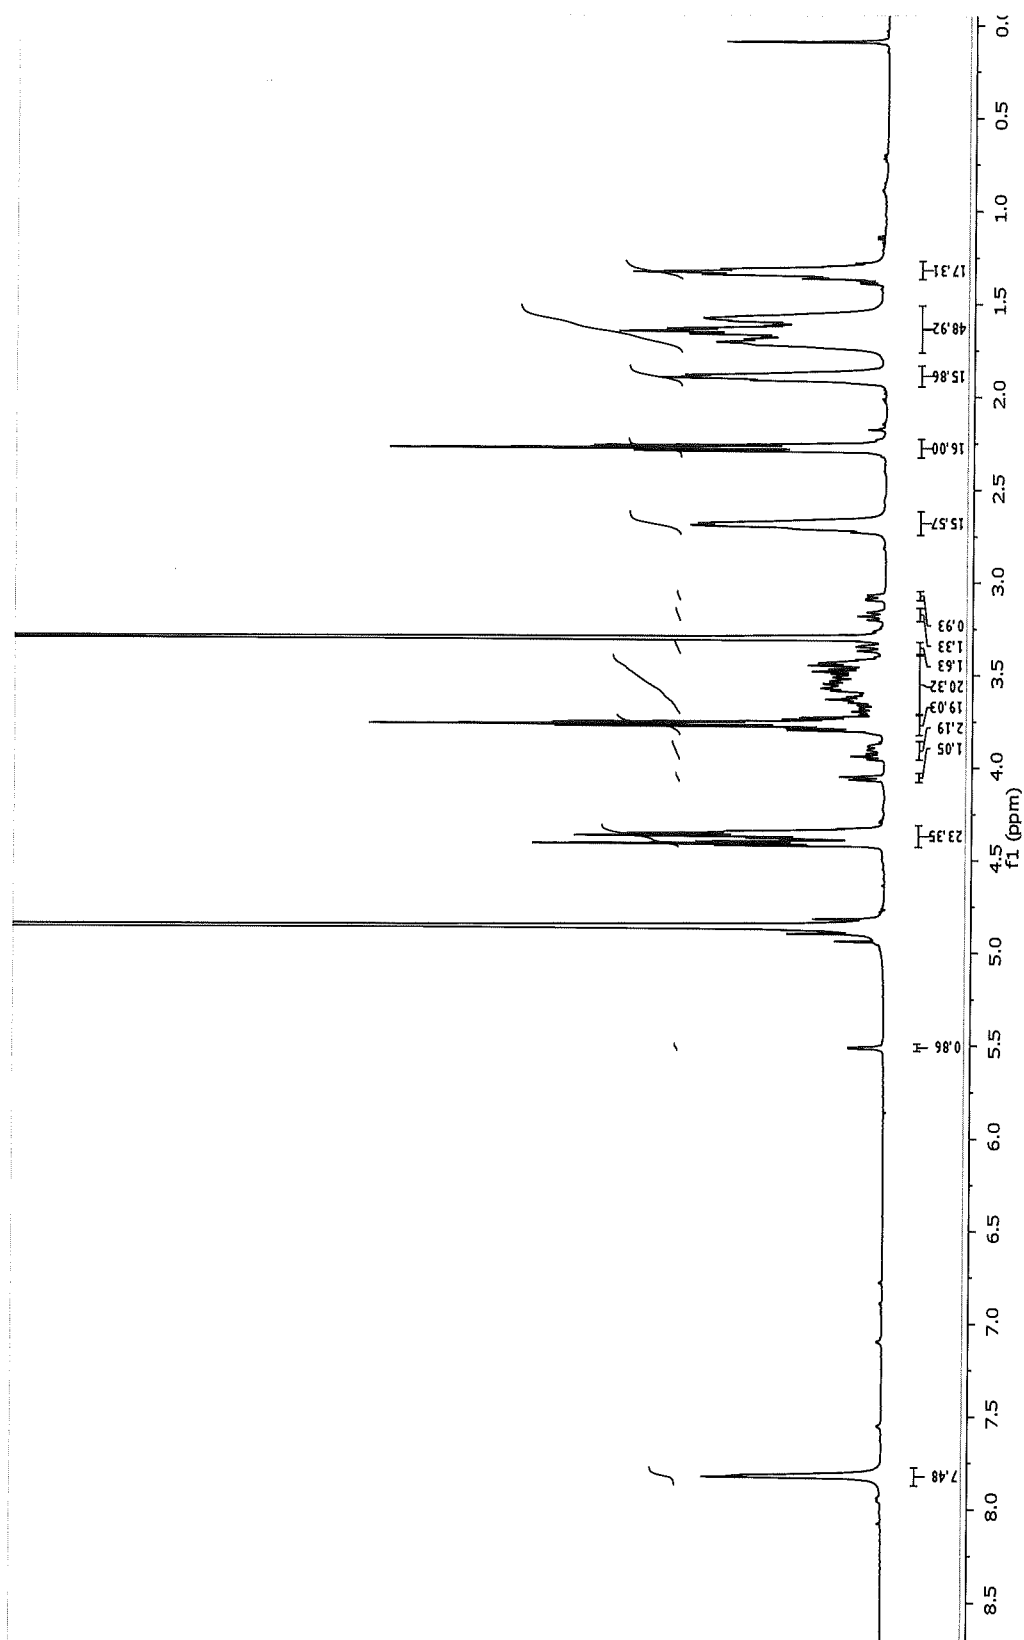

Figure S11.  $^{13}\text{C}$ -NMR of Compound 11.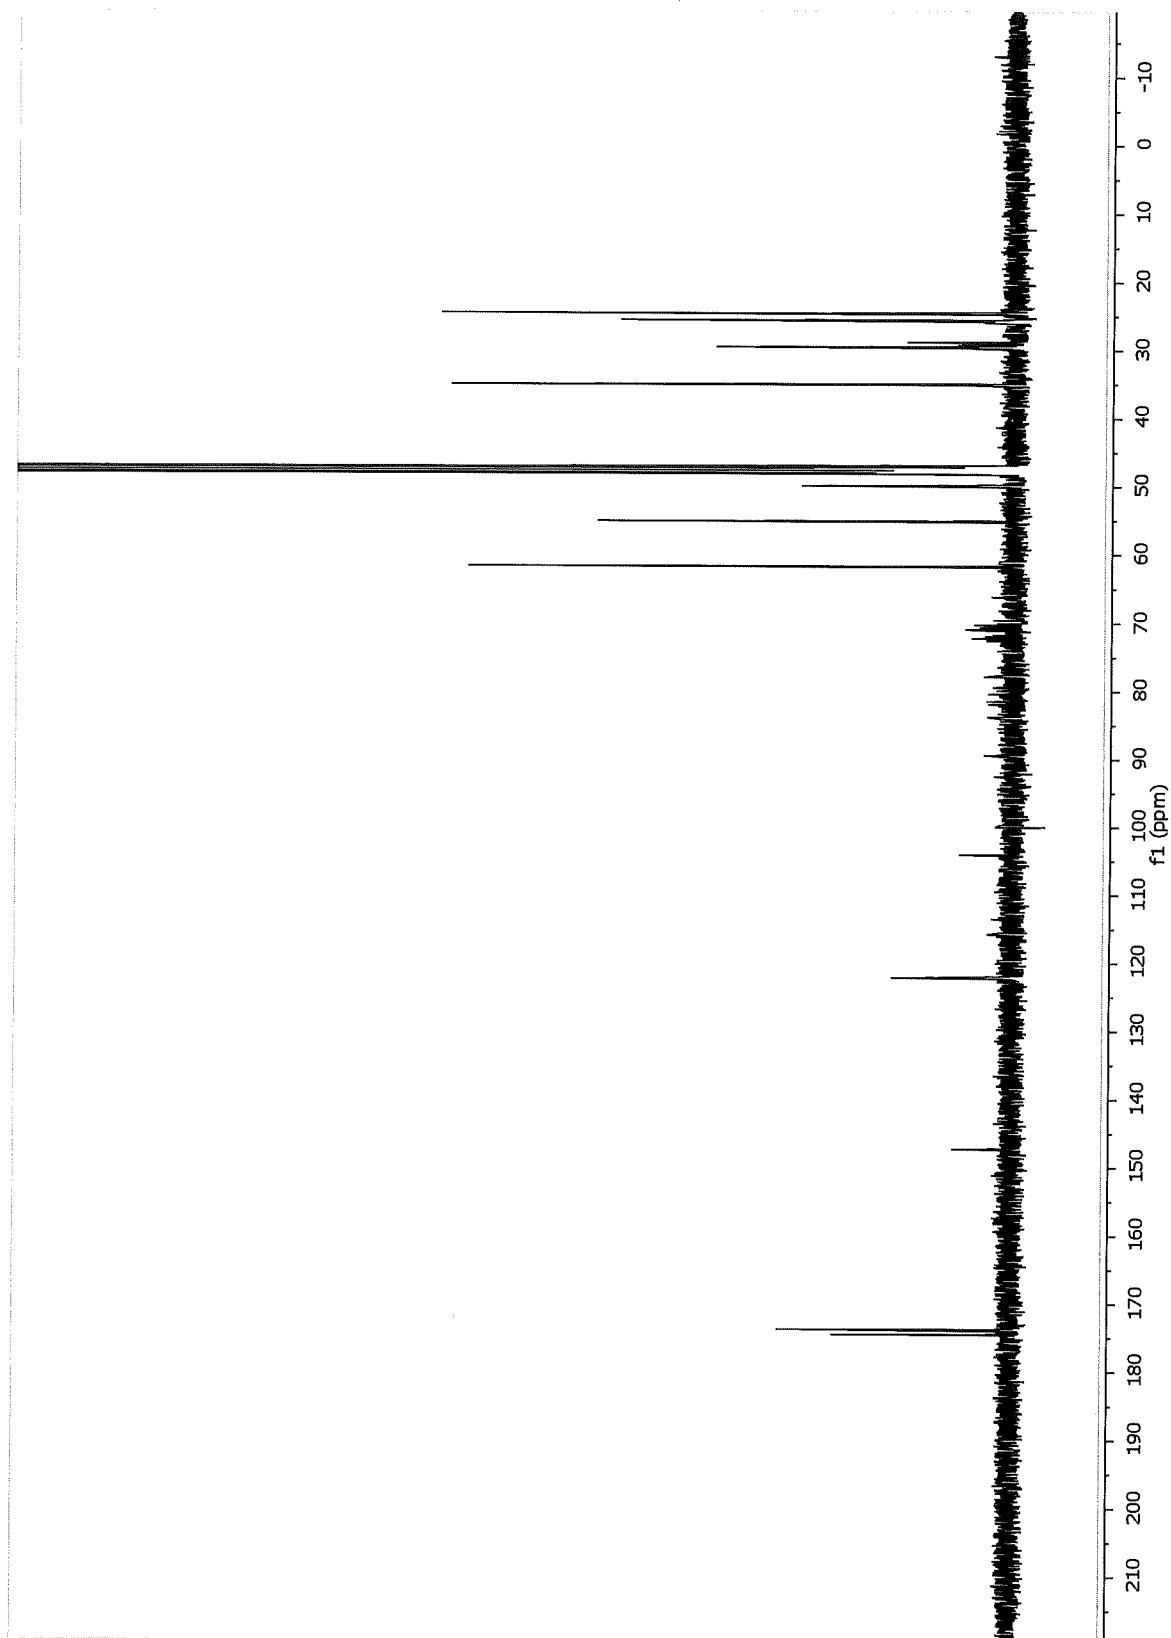

Supplement: NIHMS327933-supplement-01.pdf [file NIHMS327933-supplement-01.pdf]
